# Supplementary material for: Melt-enhanced strain localization and phase mixing in a large-scale mantle shear zone (Ronda peridotite, Spain)
Source: Copernicus journal article supplement (doi:10.5194/se-14-1123-2023), 2023-10-26
Supplement: Supplementary file 1 [file se-14-1123-2023-supplement.zip]

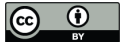

## *Supplement of*

# **Melt-enhanced strain localization and phase mixing in a large-scale mantle shear zone (Ronda peridotite, Spain)**

**Sören Tholen et al.**

*Correspondence to:* Sören Tholen (tholen@geo.uni-frankfurt.de)

- se-14-1123-2023-supplement-title-page.pdf
- Supplementary data
  - Figure S4-1 - EPMA Additional Graphs - Cpx Ol.tif
  - Figure S4-2 - EPMA Additional Graphs - Amph.tif
  - Table S1 - EPMA Measurement Settings and Detection Limits.docx
  - Table S2 - MicrostructuralData.xlsx
  - Table S3 - EPMA Data.xlsx

The copyright of individual parts of the supplement might differ from the article licence.
